# Supplementary material for: Topically applicated curcumin/gelatin-blended nanofibrous mat inhibits pancreatic adenocarcinoma by increasing ROS production and endoplasmic reticulum stress mediated apoptosis
Source: PubMed Central journal article supplement (PMC7487882; doi:10.1186/s12951-020-00687-2), 2020-09-05
Supplement: 12951_2020_687_MOESM1_ESM.pdf [file 12951_2020_687_MOESM1_ESM.pdf]

## Additional file 1

Figure S1.jpg

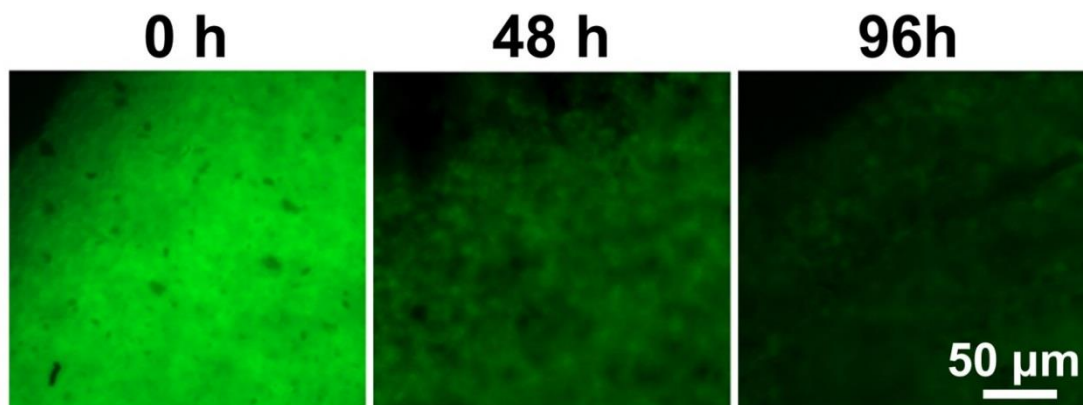

Figure S1. Fluorescence imaging of the curcumin/gelatin-blended nanofiber mats after being immersed in PBS over time.

Figure S2.jpg

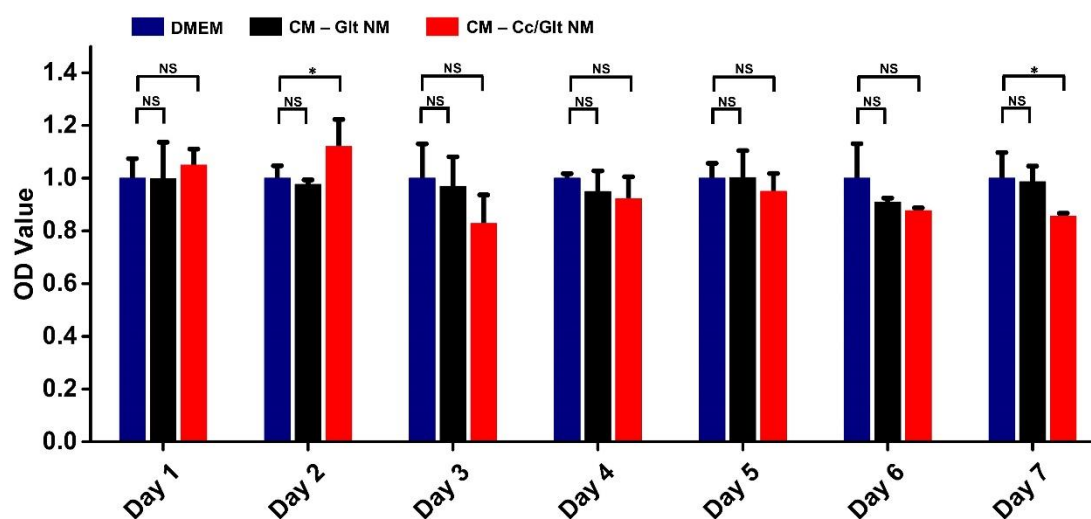

Figure S2. MTT cell viability assay for human mesenchymal stromal cells treated with CM - Cc/Glt NM or CM - Glt NM (error bar: standard deviation).
